# Supplementary material
Source: PubMed Central journal article supplement (PMC2840278)
Supplement: 0912367107_pnas.200912367SI.pdf [file 0912367107_pnas.200912367SI.pdf]

# Supporting Information

Tsai et al. 10.1073/pnas.0912367107

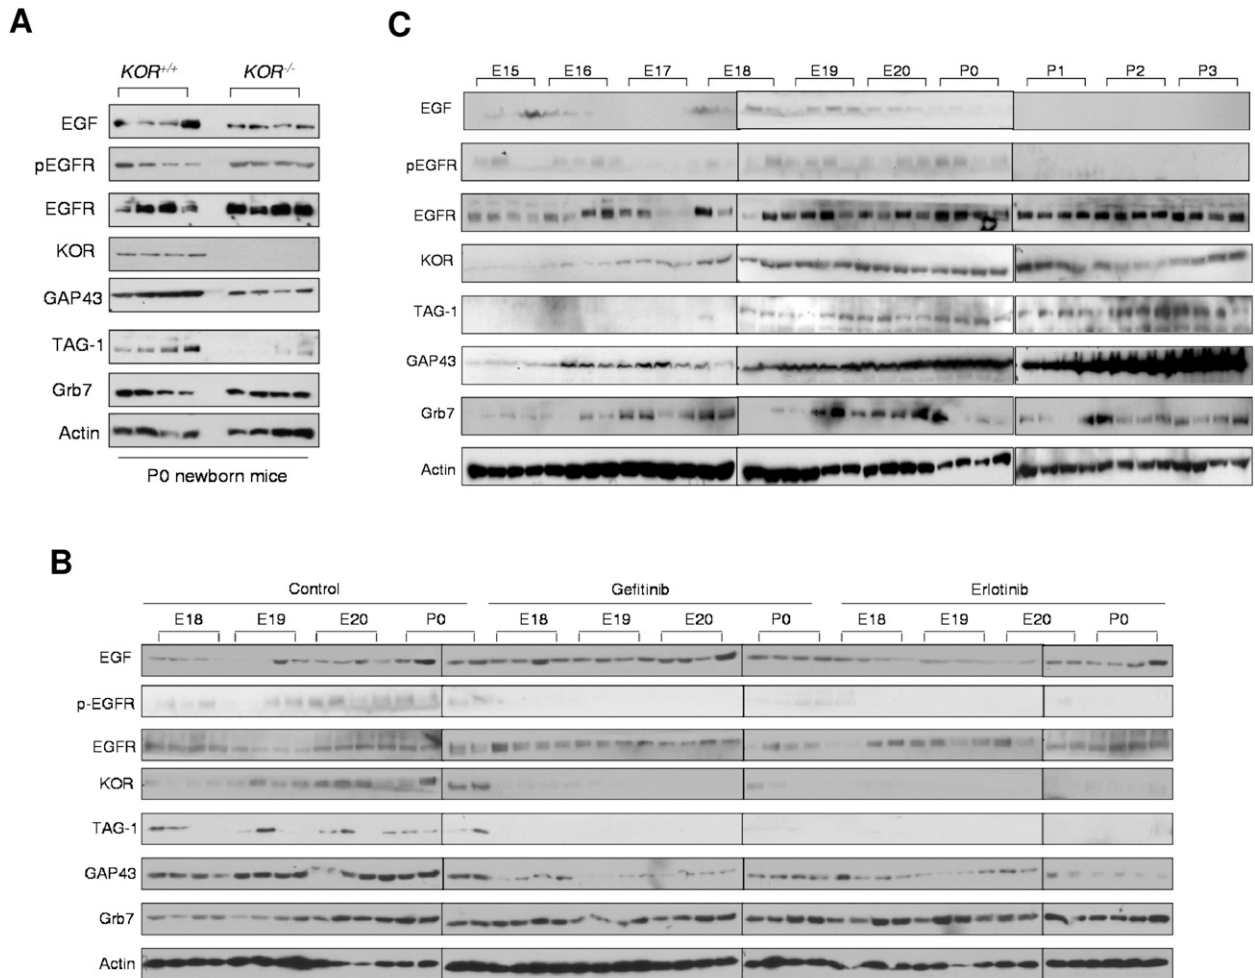

Fig. S1. Corresponding Western blots for Figs. 1 and 2. (A) Fig. 1. (B and C) Fig. 2.

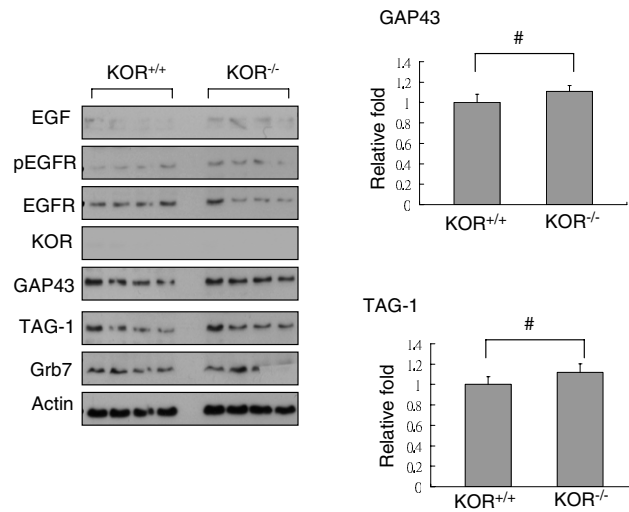

**Fig. S2.** The axon extension marker proteins, GAP43 and TAG-1, were expressed in similar level in KOR-null ( $KOR^{-/-}$ ) and WT cerebellums. Western blot of WT and KOR-null ( $KOR^{-/-}$ ) newborn cerebellums. Quantification of GAP43 and TAG-1 are shown on the right. The data represent the mean  $\pm$  SEM of the quadruple samples. #,  $P > 0.05$ .

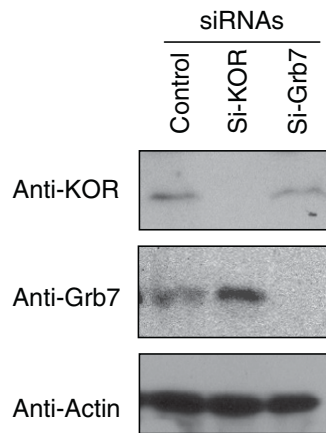

**Fig. S3.** The efficiency of siRNAs against Grb7 or KOR in primary rat DRG neurons.

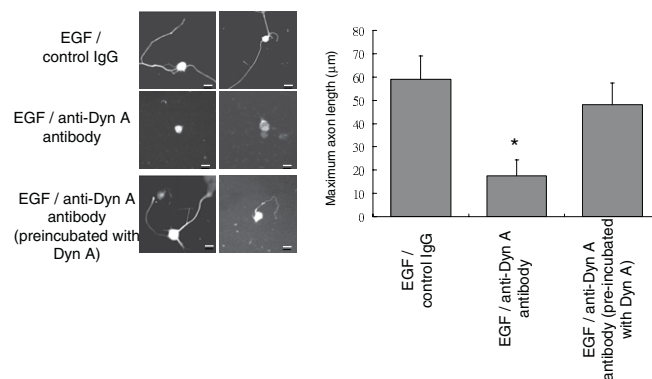

**Fig. S4.** Anti-dynorphin A antibody preincubated with dynorphin A peptide failed to block EGF-induced axon extension. (Bottom) Two immunohistochemical images from primary rat DRG neurons treated with EGF and anti-dynorphin A antibody preincubated with dynorphin A peptide. (Top and Middle) EGF-treated neurons or neurons treated with anti-dynorphin antibody and EGF serve as controls. (Right) Quantitative analysis of axon length from 50 neurons of each experiment. \*,  $P < 0.05$ .
